# Supplementary material
Source: PubMed Central journal article supplement (PMC8034505)
Supplement: NIHMS1685375-supplement-1.pdf [file NIHMS1685375-supplement-1.pdf]

## Steering Committee, Participating Site Investigators, and Observational Study Monitoring Board

Steering Committee: Colleen R. Kelly (Co-Chair), Department of Medicine, Warren Alpert Medical School of Brown University, Providence, RI; Loren Laine (Co-Chair), Yale School of Medicine, New Haven, CT and Veterans Affairs Connecticut Healthcare System, West Haven, CT; Gary D. Wu, Division of Gastroenterology and Hepatology, Perelman School of Medicine, University of Pennsylvania, Philadelphia, PA; Stacy Kahn, MD, Division of Gastroenterology, Hepatology and Nutrition, Boston Children's Hospital, Boston, MA; Thomas Moore, MD, Infectious Disease Consultants, KS; David Rubin, MD, Section of Gastroenterology, Hepatology, and Nutrition, University of Chicago Medicine, Chicago, IL; James Lewis, MD, Division of Gastroenterology and Hepatology, Perelman School of Medicine, University of Pennsylvania, Philadelphia, PA; Ashish Atreja, MD, Division of Gastroenterology, Icahn School of Medicine at Mount Sinai, New York, NY.

Participating Site Investigators: Eugene F. Yen, North-Shore University HealthSystem, Evanston, IL; Ari M. Grinspan, Icahn School of Medicine at Mount Sinai, New York, NY; Stacy A. Kahn, Boston Children's Hospital, Boston, MA; Jessica R. Allegretti, Brigham and Women's Hospital, Boston,

MA; Joel Pekow, University of Chicago Medicine, Chicago, IL; Imad Absah, Mayo Clinic, Rochester, MN; Ronald Hsu, University of California, Davis, CA; Jennifer Vincent, Baylor Scott and White Research Institute, Temple, TX; Sahil Khanna, Mayo Clinic, Rochester, MN; Lyn Tangen,<sup>19</sup>Carle Foundation Hospital, Urbana, IL; Carl V. Crawford, Weill Cornell Medicine, New York, NY; Mark C. Mattar, MedStar Georgetown University Hospital, Washington, DC; Lea Ann Chen, New York University Grossman School of Medicine, New York, NY; Monika Fischer, Indiana University, Indianapolis, IN; Razvan I. Arsenescu, Atlantic Digestive Health Institute, Morristown, NJ; Paul Feuerstadt, Medical Research Center of Connecticut, Hamden, CT; Jonathan Goldstein, Gastroenterology Group of Rochester, Rochester, NY; David Kerman, University of Miami, Miami, FL; Adam Ehrlich, Lewis Katz School of Medicine at Temple University, Philadelphia, Philadelphia, PA.

Observational Study Monitoring Board: Christina Surawicz (Chair), Division of Gastroenterology, Department of Medicine, University of Washington School of Medicine, Seattle, WA.; Erik R. Dubberke, Department of Medicine, Division of Infectious Diseases, School of Medicine, Washington University, St. Louis, MO; Allison C. Brown, National Center for Emerging and Zoonotic Infectious Diseases, Centers for Disease Control and Prevention, Atlanta, GA.

**Supplementary Table 1.** Data Elements at Baseline: Fecal Microbiota Transplantation Technique and Characteristics and Treatment Indications

| Data element                                                                |
|-----------------------------------------------------------------------------|
| FMT technique                                                               |
| Transplant material                                                         |
| Directed donor stool                                                        |
| Stool bank                                                                  |
| Modified human stool                                                        |
| Cultured bacterial product derived from stool                               |
| Microbial consortia not derived from stool                                  |
| Donor screening                                                             |
| Screening questionnaire                                                     |
| Interview                                                                   |
| Physical examination                                                        |
| Serologic screening                                                         |
| Stool screening                                                             |
| Recipient screening                                                         |
| Baseline laboratory tests                                                   |
| Transplant material preparation                                             |
| Location of preparation                                                     |
| Volume/weight of stool used                                                 |
| Diluents                                                                    |
| Processing/filtration methods                                               |
| Material storage                                                            |
| Capsule                                                                     |
| Amount of material delivered (mL or g)                                      |
| Method of delivery                                                          |
| Oral ingestion (capsules or liquid)                                         |
| Nasogastric/intestinal tube                                                 |
| Endoscopic (upper or lower)                                                 |
| Enema                                                                       |
| Other                                                                       |
| Delivery schedule                                                           |
| Single dose                                                                 |
| Multiple dose                                                               |
| Maintenance                                                                 |
| Characteristic                                                              |
| Donor baseline                                                              |
| Demographics                                                                |
| Medical conditions                                                          |
| Recipient baseline                                                          |
| Demographics                                                                |
| Body mass index                                                             |
| Medical conditions                                                          |
| Laboratory data                                                             |
| CDI: strain, duration, pre-FMT treatments, severity of CDI, no. of episodes |
| IBD: type, duration, location severity, pre-FMT treatments, IBD history     |
| FMT indication                                                              |
| CDI                                                                         |
| CDI + IBD                                                                   |
| IBD                                                                         |
| Irritable bowel syndrome                                                    |
| Chronic constipation                                                        |
| Obesity                                                                     |
| Diabetes                                                                    |
| Metabolic syndrome                                                          |
| Nonalcoholic fatty liver disease/nonalcoholic steatohepatitis               |
| Neurologic or neurodevelopmental disorder                                   |
| Other                                                                       |

**Supplementary Table 2.**Data Elements: Effectiveness and Safety Outcomes

| Data element                                  |
|-----------------------------------------------|
| FMT effectiveness                             |
| CDI                                           |
| Cure                                          |
| Recurrence                                    |
| Post-FMT CDI therapies                        |
| IBD                                           |
| IBD-severity at times points post-FMT         |
| IBD-related hospitalization post-FMT          |
| IBD-related surgery post-FMT                  |
| IBD-related medications post-FMT              |
| Complications                                 |
| Safety outcomes collected at 1 month post FMT |
| Procedure-related                             |
| Sedation complications                        |
| Bleeding                                      |
| Perforation                                   |
| Other                                         |
| Post-FMT symptoms                             |
| Diarrhea                                      |
| Constipation                                  |
| Abdominal pain                                |
| Bloating                                      |
| Nausea and/or vomiting                        |
| Other                                         |
| Documented infections                         |
| Describe                                      |
| Relationship to FMT                           |
| Specify site                                  |
| Hospitalization                               |
| Reason                                        |
| Relationship to FMT                           |
| Duration                                      |
| Outcome                                       |
| Life-threatening experience                   |
| Describe                                      |
| Relationship to FMT                           |
| Outcome                                       |
| Death                                         |
| Cause of death                                |
| Relationship to FMT                           |
| Site of death                                 |
| Outcomes collected $\geq$ 6 mo post FMT       |
| Serious infection                             |
| Describe                                      |
| Treatment                                     |
| Duration of treatment                         |
| Outcome                                       |
| Hospitalization                               |
| Use of new drugs                              |
| Describe                                      |
| Currently taking?                             |
| New surgery/procedure                         |
| Describe                                      |
| Diagnosis of new conditions                   |
| Allergy                                       |
| Asthma                                        |
| Autoimmune                                    |
| Cardiovascular                                |
| Colon cancer and other malignancies           |
| IBD                                           |

**Supplementary Table 2.**Continued

| Data element             |
|--------------------------|
| Irritable bowel syndrome |
| Metabolic                |
| Neurologic               |
| Psychiatric              |
| Other                    |
| Hospitalization          |
| Reason                   |
| Life-threatening illness |
| Describe                 |
| Outcome                  |
| Death                    |
| Cause of death           |
| Site of death            |
